# Supplementary material
Source: PubMed Central journal article supplement (PMC3340273)

## **Supplementary data**

### **Figure 1. Unique LC-MS/MS spectra indentifying PC1/3**

Representation of the three unique spectra indentifying PC1/3 with their ion fragmentation sequences.

### **Figure 2. TEM on peritoneal macrophages.**

A. General aspect of WT and KO macrophages under control (PBS) or LPS (8h) condition. B. Mean area of cells. C. Mean number of vacuoles by cells.

### **Figure 3. Immunohistology of B-cells markers.**

Parafilm embedded spleen from WT and KO mice were analyzed for B-cell markers (IgM, CD20, CD22) by immunohistology.

### **Figure 4 Immunohistology of T-cells markers.**

Parafilm embedded spleen from WT and KO mice were analyzed for B-cell markers (CD3, CD4, CD7) by immunohistology.

### **Figure 5 Immunohistology of Natural Killer cells markers.**

Parafilm embedded spleen from WT and KO mice were analysed for B-cell markers (CD56, CD57) by immunohistology.

Supplementary data  
Fig. 1

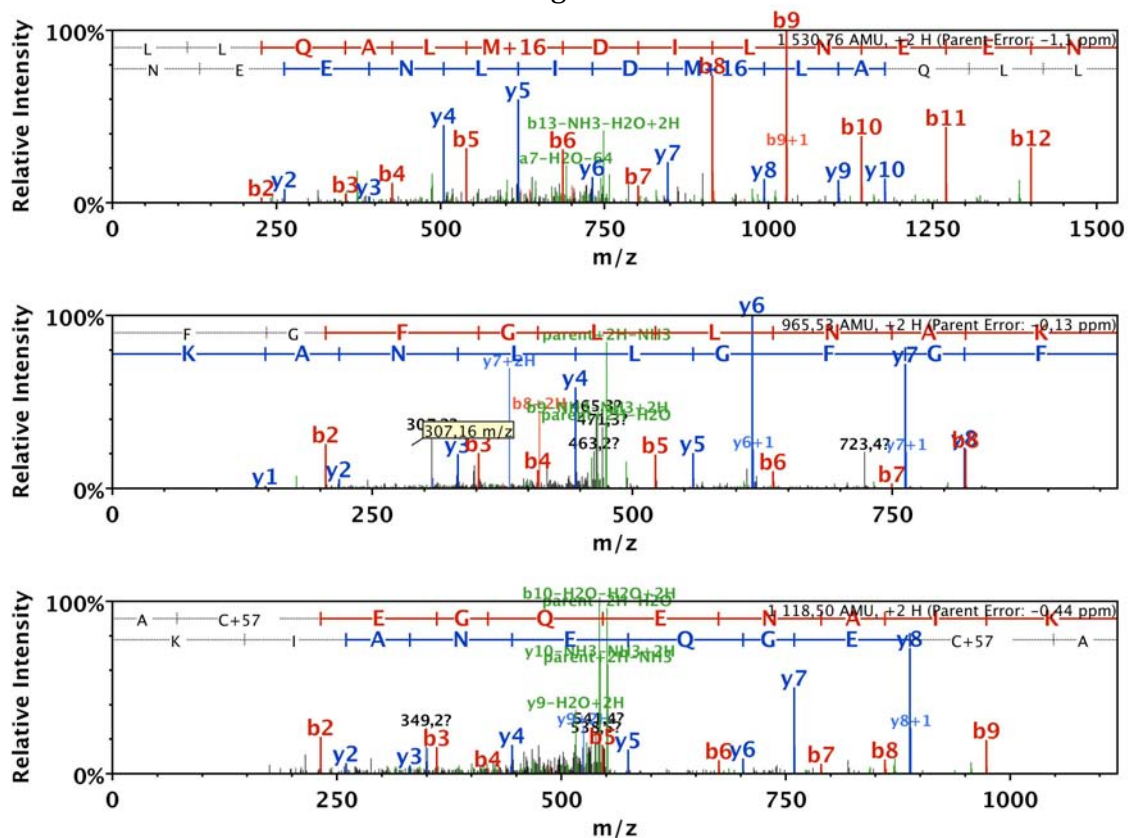

Fig.2

A

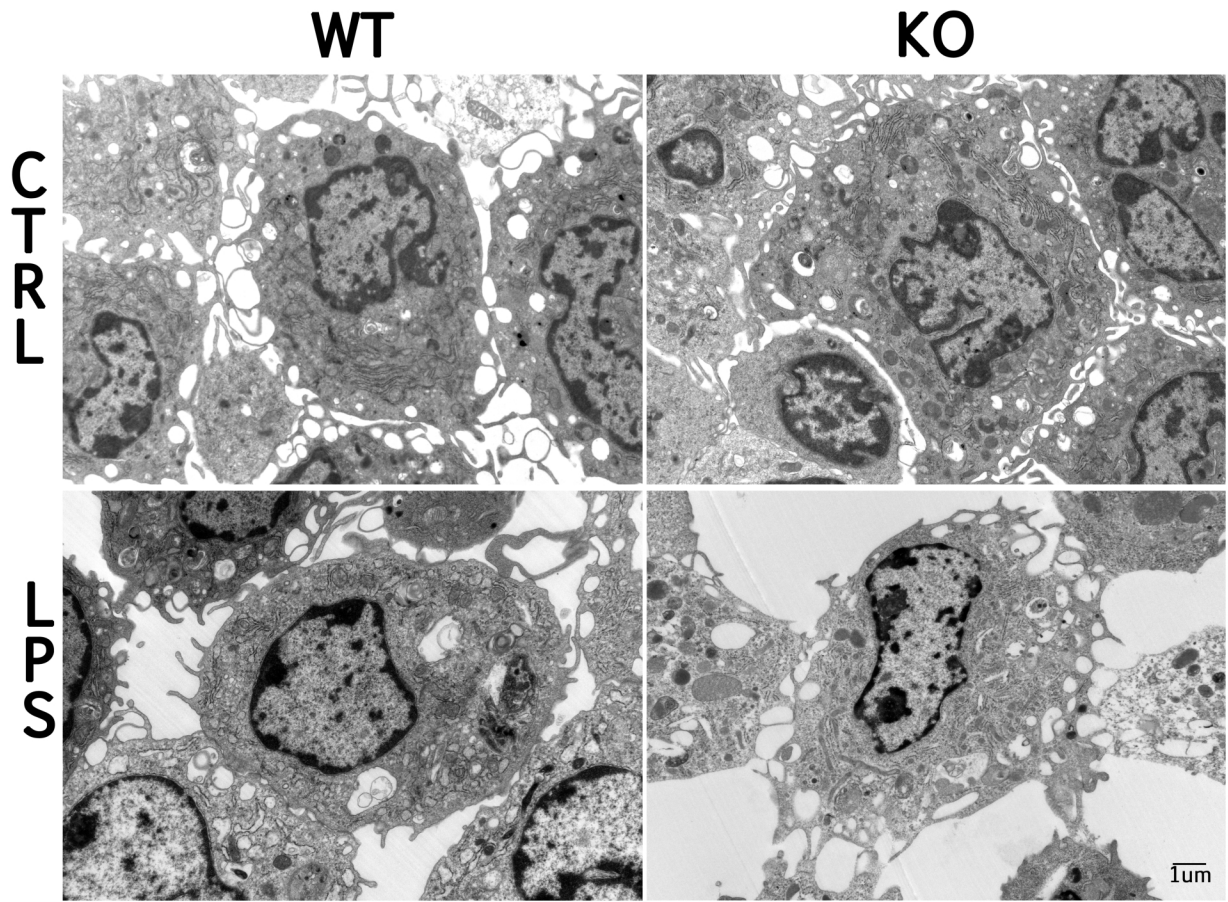

B

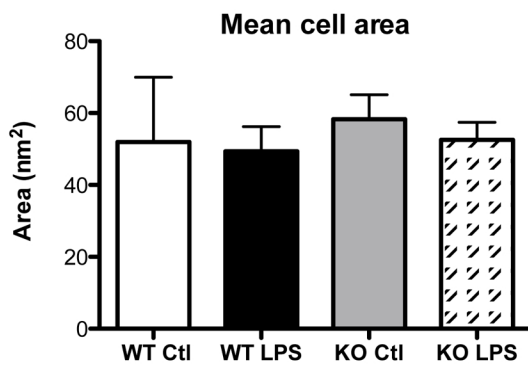

C

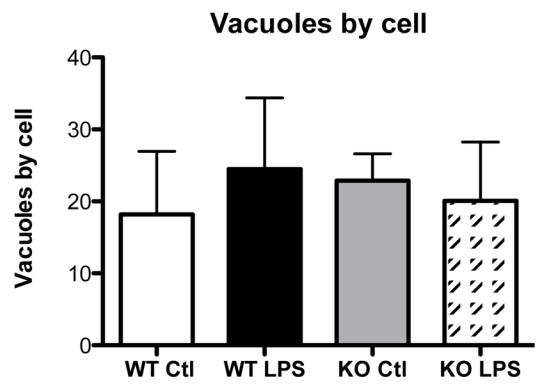

Fig. 3

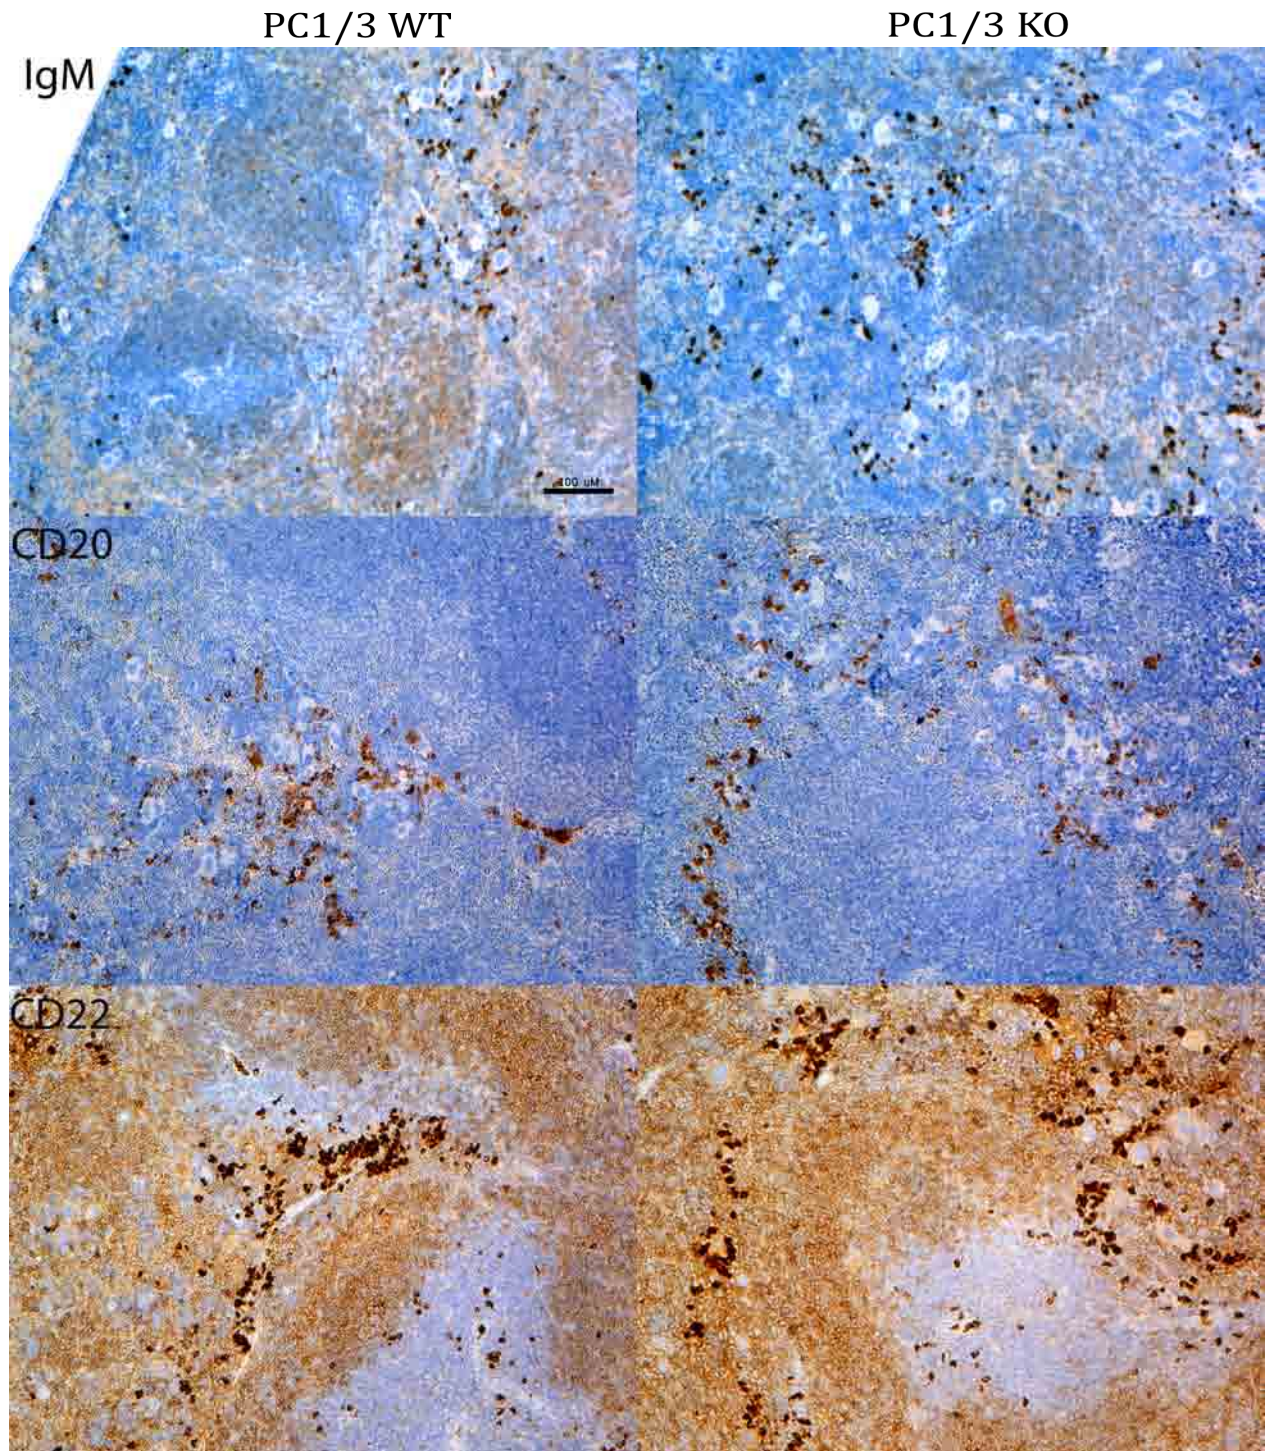

Fig. 4

PC1/3 WT

PC1/3 KO

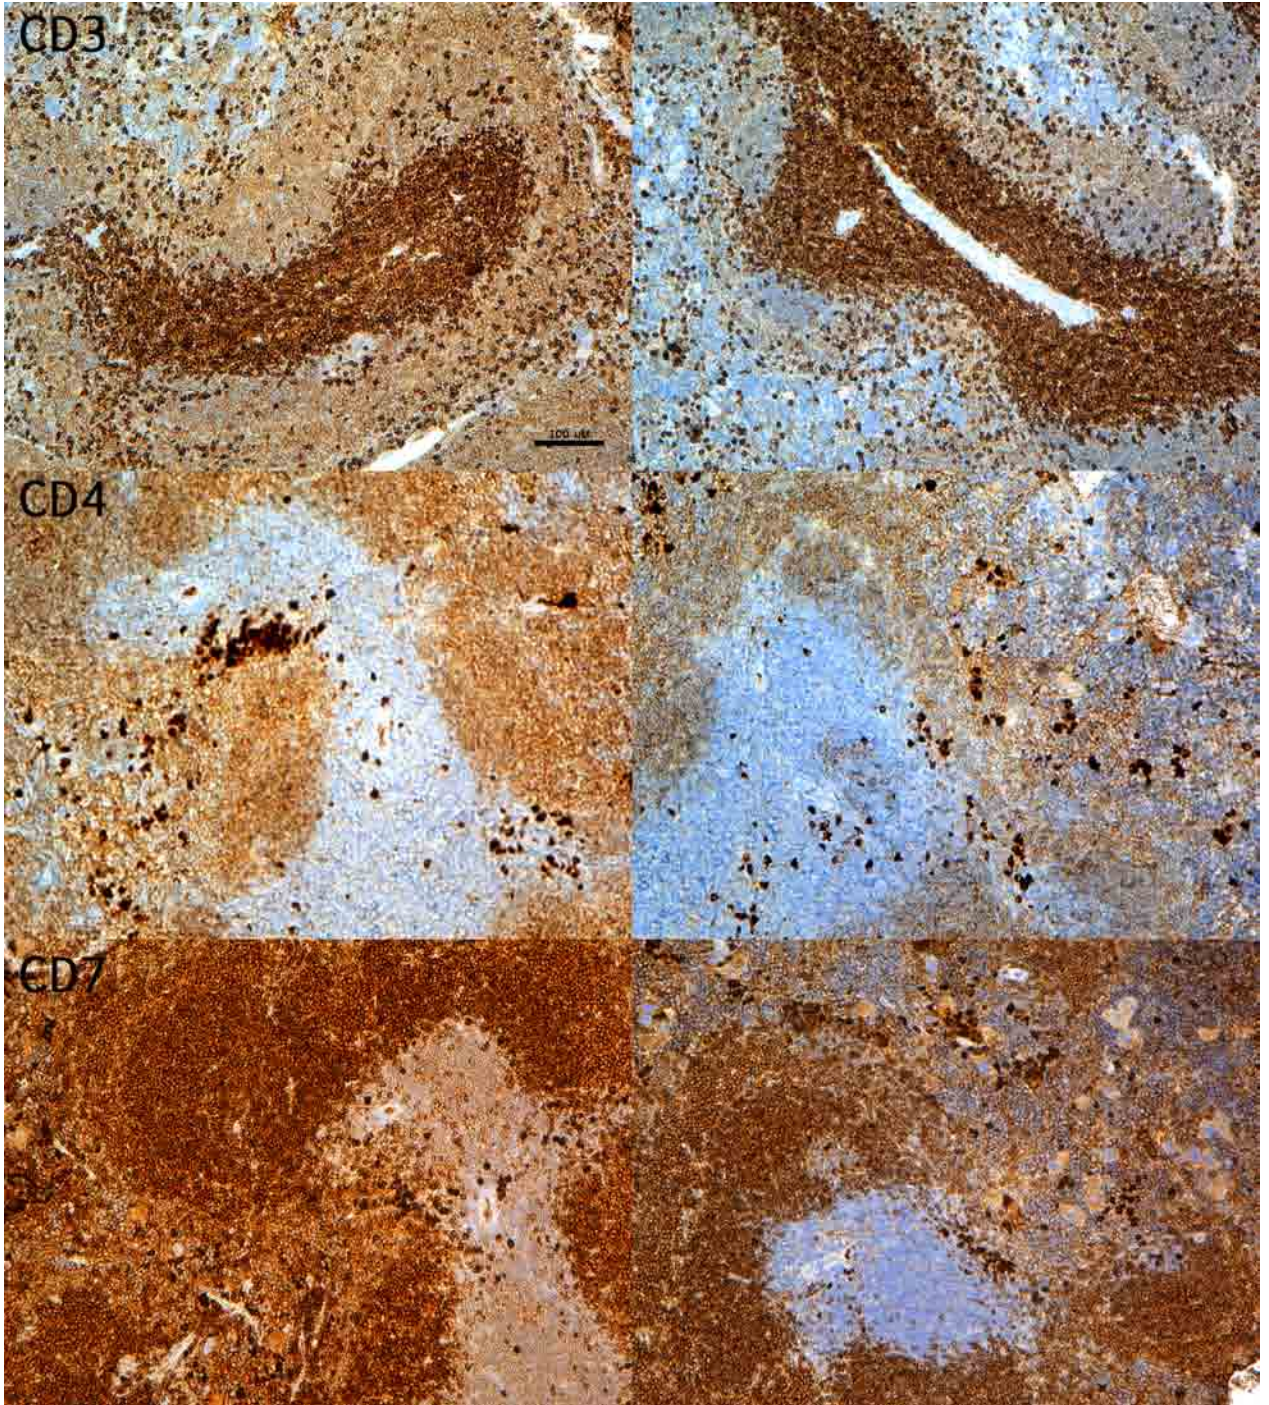

Fig. 5

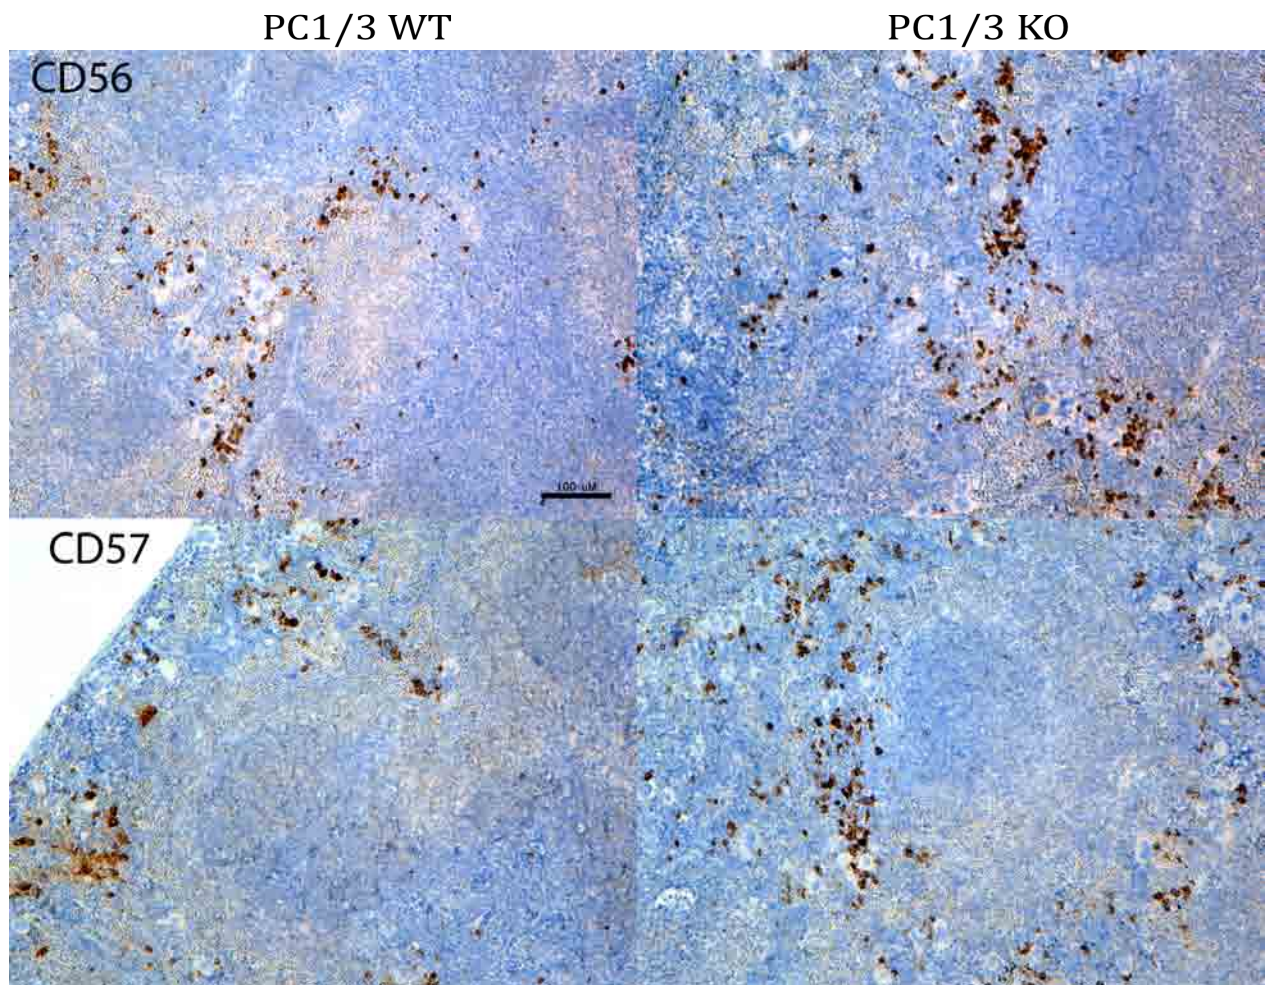

Supplement: supp_M111.323220_jbc.M111.323220-1.pdf [file supp_M111.323220_jbc.M111.323220-1.pdf]
